# Supplementary material for: Intestinal Microbiota Changes in Individuals Living with HIV and the Effect of Antiretroviral Therapy
Source: Research Square preprint supplement (doi:10.21203/rs.3.rs-7878027/v1), 2025-11-03
Supplement: Supplementary file 1 [file da4548f38adb966cf6940f00.docx]

**Inclusion Criteria**

**HIV/AIDS Group**

1. HIV antibody positive and HIV infection confirmed by standard diagnostic tests;
2. Aged 18–65 years, with a normal body mass index (BMI);
3. On stable antiretroviral therapy (ART) or eligible for ART according to national guidelines;
4. No symptoms of chronic infection (e.g., fatigue, hot flashes, night sweats) within at least the past month;
5. No significant weight changes during the past month;
6. No use of antibiotics, probiotics, or other microbiota-modifying preparations within the past month;
7. Willing to voluntarily participate in the study and provide written informed consent;
8. No co-infection with other sexually transmitted diseases (STDs).

**Healthy Control Group**

1. HIV antibody negative and no history of HIV infection;
2. Aged 18–65 years, with a normal body mass index (BMI);
3. No symptoms of chronic infection (e.g., fatigue, hot flashes, night sweats) within at least the past month;
4. No significant weight changes during the past month;
5. No use of antibiotics, probiotics, or other microbiota-modifying preparations within the past month;
6. Willing to voluntarily participate in the study and provide written informed consent;
7. No diagnosis of sexually transmitted diseases (STDs) or other chronic conditions that could affect gut microbiota.

**Exclusion Criteria**

**HIV/AIDS Group**

1. Individuals without confirmed diagnostic testing for HIV infection;
2. Those unwilling or unable to provide informed consent, or who do not understand the purpose of the study;
3. Use of antibiotics, probiotics, or irregular dietary habits within the past month;
4. Presence of significant comorbidities, including multiple organ damage, severe chronic illness, or other conditions that may affect intestinal microbiota;
5. Co-infection with hepatitis B, hepatitis C, or other sexually transmitted diseases (STDs);
6. Pregnant or breastfeeding women.

**Healthy Control Group**

1. Individuals with a positive HIV antibody test or suspected HIV infection;
2. Those unwilling or unable to provide informed consent, or who do not understand the purpose of the study;
3. Use of antibiotics, probiotics, or irregular dietary habits within the past month;
4. Presence of significant comorbidities, including multiple organ damage, severe chronic illness, or other conditions that may affect intestinal microbiota;
5. History of sexually transmitted diseases (STDs), hepatitis B, or hepatitis C;
6. Pregnant or breastfeeding women.
